# Supplementary material
Source: MDPI journal article supplement (https://www.mdpi.com/search?q=jcm-08-00527)
Supplement: s001 [file jcm-08-00527-s001.pdf]

**Supplemental Table 1.** Ceramides concentrations and ceramide risk scores (CRS) by risk category.

| <b>Ceramides,<br/>Ratio or CRS</b> | <b>All<br/>(n=96)</b> | <b>Lower Risk<br/>(n=56)</b> | <b>Moderate Risk<br/>(n=40)</b> | <b>p-value</b> |
|------------------------------------|-----------------------|------------------------------|---------------------------------|----------------|
| C16:0                              | 0.18 (0.10-0.32)      | 0.17 (0.10-0.26)             | 0.20 (0.13-0.33)                | <.0001         |
| C18:0                              | 0.09 (0.03-0.19)      | 0.07 (0.03-0.11)             | 0.12 (0.06-0.19)                | <.0001         |
| C20:0*                             | 0.12 (0.05-0.29)      | 0.10 (0.05-0.22)             | 0.14 (0.07-0.29)                | <.0001         |
| C22:0*                             | 1.56 (0.67-4.48)      | 1.49 (0.67-2.63)             | 1.66 (0.74-4.48)                | 0.2478         |
| C24:0*                             | 4.32 (2.05-8.81)      | 4.40 (2.75-6.45)             | 4.22 (2.05-8.81)                | 0.1463         |
| C24:1*                             | 1.37 (0.70-2.99)      | 1.19 (0.70-2.00)             | 1.62 (0.82-2.99)                | <.0001         |
| C16:0/C24:0                        | 0.04 (0.03-0.08)      | 0.04 (0.03-0.06)             | 0.05 (0.03-0.08)                | <.0001         |
| C18:0/C24:0*                       | 0.02 (0.01-0.05)      | 0.02 (0.01-0.04)             | 0.03 (0.02-0.05)                | <.0001         |
| C24:1/C24:0                        | 0.33 (0.16-0.63)      | 0.28 (0.16-0.39)             | 0.40 (0.22-0.63)                | <.0001         |
| Ceramide Risk<br>Score*            | 2.5 (0-8)             | 1.05 (0-2)                   | 4.53 (3-8)                      |                |

Values represent mean ceramide concentrations  $\mu\text{mol/L}$  (range). Independent t-test assuming unequal variance was used to compare ceramide values for 'lower risk' (0-2) vs. 'moderate risk' (3-6) categories unless data was not normally distributed (indicated via \*), in which case a nonparametric Wilcoxon test was applied.

**Supplemental Table 2.** Bivariate analysis of ceramides by risk factors for cardiovascular disease to assess for possible covariates.

| Risk Factor    | C16:0                    | C18:0                    | C24:1                   | C16:0/24:0              | C18:0/24:0              | C24:1/24:0            | C24:0                    | Risk Score            | C20:0                   | C22:0                    |
|----------------|--------------------------|--------------------------|-------------------------|-------------------------|-------------------------|-----------------------|--------------------------|-----------------------|-------------------------|--------------------------|
| FMI            | NS                       | 0.37; 0.14<br>(<0.001)   | NS                      | 0.21; 0.08<br>(0.003)   | 0.53; 0.25<br>(<0.001)  | 0.17; 0.06<br>(0.01)  | -0.15; 0.06<br>(0.01)*   | 2.86; 0.05<br>(0.01)  | NS                      | NS                       |
| LDL            | NS                       | NS                       | 0.0009; 0.05<br>(0.02)* | NS                      | NS                      | NS                    | 0.001; 0.12<br>(<0.001)* | NS                    | 0.001; 0.04<br>(0.03)*  | 0.001; 0.11<br>(<0.001)* |
| HDL            | -0.35; 0.16<br>(<0.001)* | -0.68; 0.21<br>(<0.001)* | NS                      | -0.24; 0.04<br>(0.02)   | -0.58; 0.12<br>(<0.001) | NS                    | NS                       | NS                    | -0.35; 0.06<br>(0.007)  | -0.33; 0.07<br>(0.004)   |
| Non-HDL        | 0.25; 0.05<br>(0.01)*    | NS                       | 0.47; 0.17<br>(<0.001)* | -0.30; 0.05<br>(0.02)   | NS                      | NS                    | 0.55; 0.28<br>(<0.001)*  | NS                    | 0.69; 0.20<br>(<0.001)* | 0.73; 0.30<br>(<0.001)*  |
| Glucose        | 0.67; 0.07<br>(0.008)*   | 1.34; 0.09;<br>(0.002)*  | NS                      | 0.92; 0.08<br>(0.003)*  | 1.58; 0.11<br>(<0.001)* | NS                    | NS                       | NS                    | NS                      | NS                       |
| Fibrinogen     | NS                       | NS                       | NS                      | 0.45; 0.11<br>(<0.001)* | 0.63; 0.09<br>(0.002)   | 0.32; 0.06<br>(0.01)  | -0.43; 0.14<br>(<0.001)* | NS                    | NS                      | NS                       |
| Smoking status | NS                       | NS                       | NS                      | NS                      | NS                      | 0.08<br>(0.004)*      | 0.05<br>(0.02)           | 0.05<br>(0.02)*       | NS                      | 0.05<br>(0.02)           |
| WC, cm         | NS                       | 0.004; 0.18<br>(<0.001)  | NS                      | 0.002; 0.06<br>(0.02)   | 0.005; 0.22<br>(<0.001) | 0.002; 0.05<br>(0.03) | NS                       | 0.030; 0.06<br>(0.02) | NS                      | NS                       |
| WHR, cm        | NS                       | 0.62; 0.08<br>(0.006)    | NS                      | NS                      | NS                      | NS                    | NS                       | NS                    | NS                      | NS                       |
| Triglycerides  | NS                       | 0.40; 0.15<br>(<0.001)   | 0.16; 0.07 (0.01)       | NS                      | NS                      | NS                    | 0.18; 0.10<br>(0.003)    | NS                    | 0.40; 0.22<br>(<0.001)  | NS                       |
| Insulin        | NS                       | 0.23; 0.19<br>(<0.001)   | NS                      | 0.08; 0.04 (0.04)       | 0.26; 0.20<br>(<0.001)  | NS                    | NS                       | 1.44; 0.05 (0.02)     | 0.15; 0.10<br>(0.002)   | NS                       |
| HOMA-IR        | 0.07; 0.06 (0.02)        | 0.23; 0.18<br>(<0.001)   | NS                      | 0.10; 0.06 (0.02)       | 0.25; 0.18<br>(<0.001)  | NS                    | NS                       | NS                    | 0.15; 0.10<br>(0.002)*  | NS                       |
| CRP            | NS                       | 0.12; 0.07<br>(0.01)     | NS                      | NS                      | 0.15; 0.09<br>(0.004)   | NS                    | NS                       | NS                    | NS                      | NS                       |
| Diabetes       | NS                       | 0.06<br>(0.006)          | NS                      | NS                      | 0.04<br>(0.03)          | NS                    | NS                       | NS                    | NS                      | NS                       |
| MetS           | NS                       | 0.06<br>(0.008)          | NS                      | NS                      | 0.09<br>(<0.001)        | NS                    | NS                       | NS                    | NS                      | NS                       |

Values reported are slope per unit change; coefficient of determination ( $R_2$ ) (p-value). For smoking, diabetes, and MetS,  $R_2$  and p-value reported. \*p-values significant in bivariate analysis that remained significant after stepwise regression and were included in the adjusted model. Abbreviations: LDL, low density lipoprotein; HDL, high density lipoprotein; WC, waist circumference; WHR, waist-to-hip ratio; HOMA-IR, homeostatic model assessment of insulin resistance; CRP, c-reactive protein; MetS, Metabolic Syndrome; NS, non-significant. Variables not significant with any ceramides include: age, gender, income, statin use, and hypertension. .
